# Supplementary material for: Portable smart highly proton conductive all inorganic gel paste electrolyte with optimum phosphorous to silicon ratio for enhanced durable operation of a fuel cell
Source: Royal Society of Chemistry journal article supplement (doi:10.1039/c8se00142a), 2018-01-01
Supplement: c8se00142a1.pdf [file c8se00142a1.pdf]

## Supporting Information

### **Portable smart highly proton conductive all inorganic gel paste electrolyte with optimum phosphorous to silicon ratio for enhanced, durable operation of fuel cell**

Priyanka Ghosh<sup>1</sup>, Chandan Kumar Dhole<sup>1</sup>, Saibal Ganguly<sup>2</sup>, Dipali Banerjee<sup>3</sup> and Kajari Kargupta<sup>1\*</sup>

<sup>1</sup>Chemical Engineering Department, Jadavpur University, Kolkata 700032, India

<sup>2</sup>Chemical Engineering Department, BITS PILANI, Goa Campus 403726, India

<sup>3</sup>Department of Physics, Indian Institute of Engineering Science and Technology (I.I.E.S.T), Shibpur 711103, West Bengal, India

\*Corresponding author email: [karguptakajari2011@gmail.com](mailto:karguptakajari2011@gmail.com)

Tel: +91 983106358, +919748829349, Fax +91 33 2414 6378

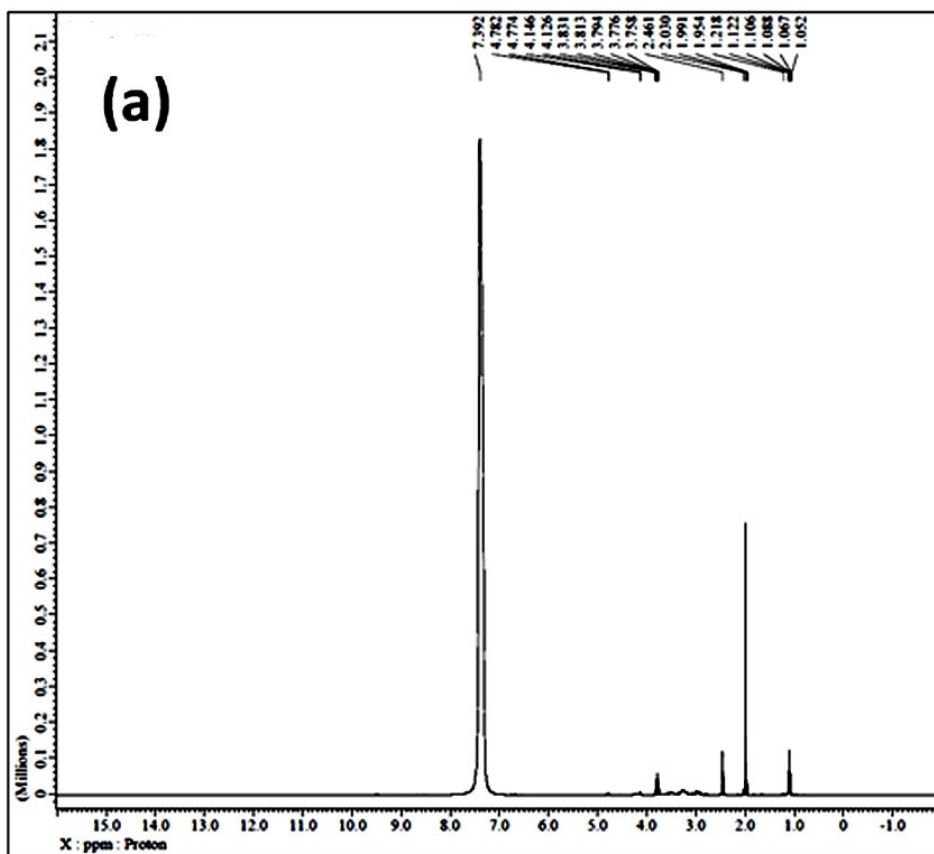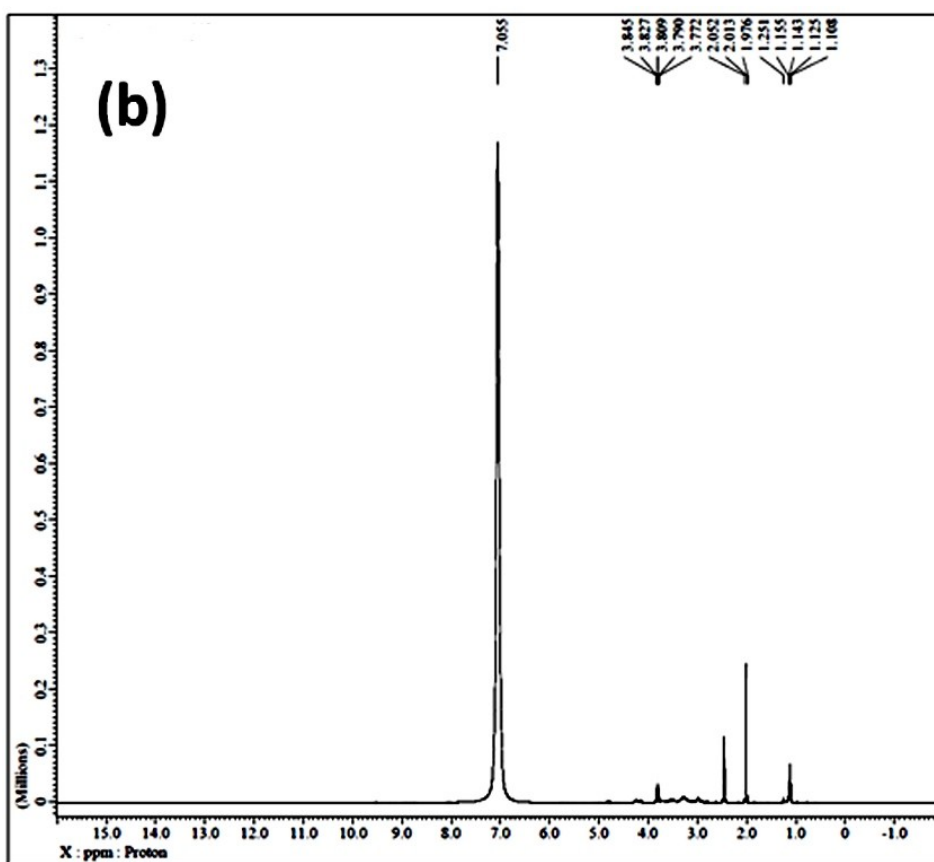

Figure S1.  $^1\text{H}$  NMR spectra of (a) Gel Paste – 4 and (b) Gel Paste - 6

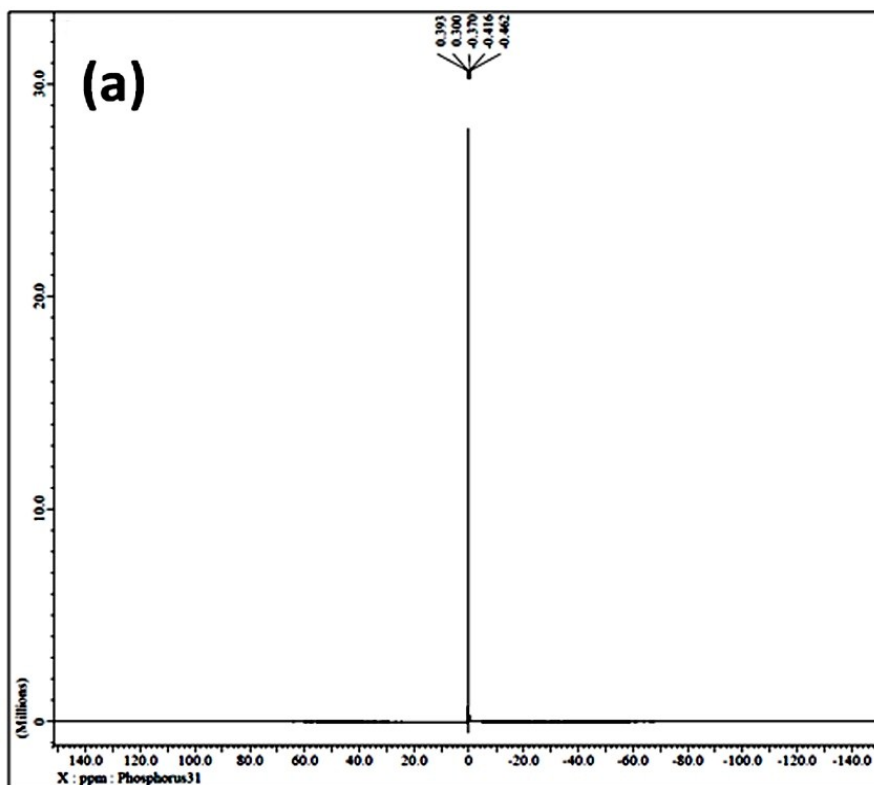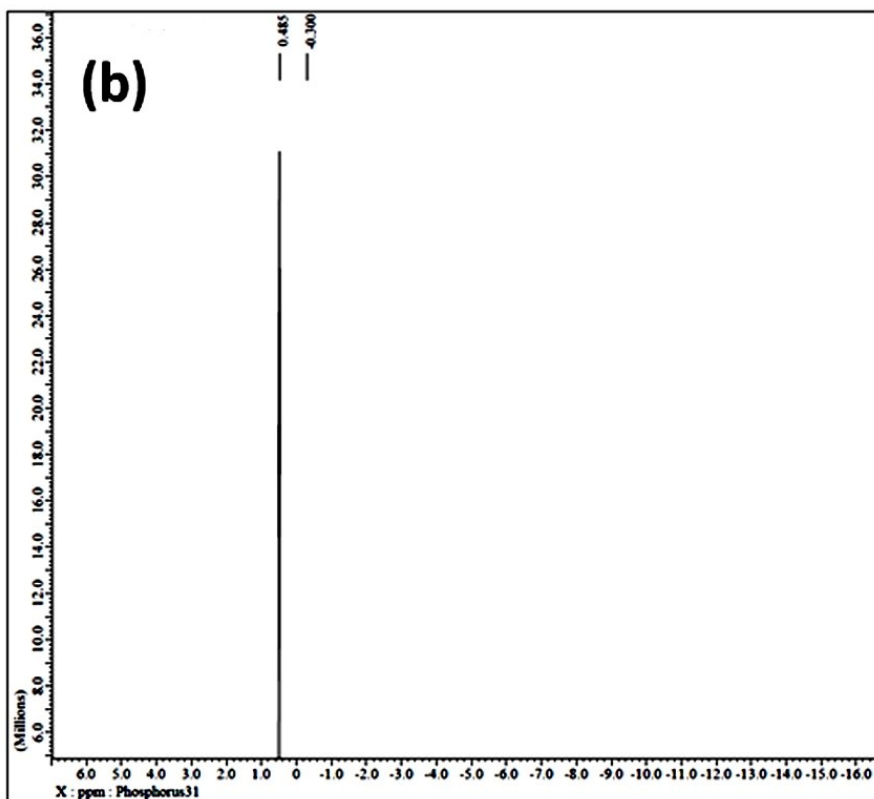

Figure S2.  $^{31}\text{P}$  NMR spectra of (a) Gel Paste – 4 and (b) Gel Paste - 6

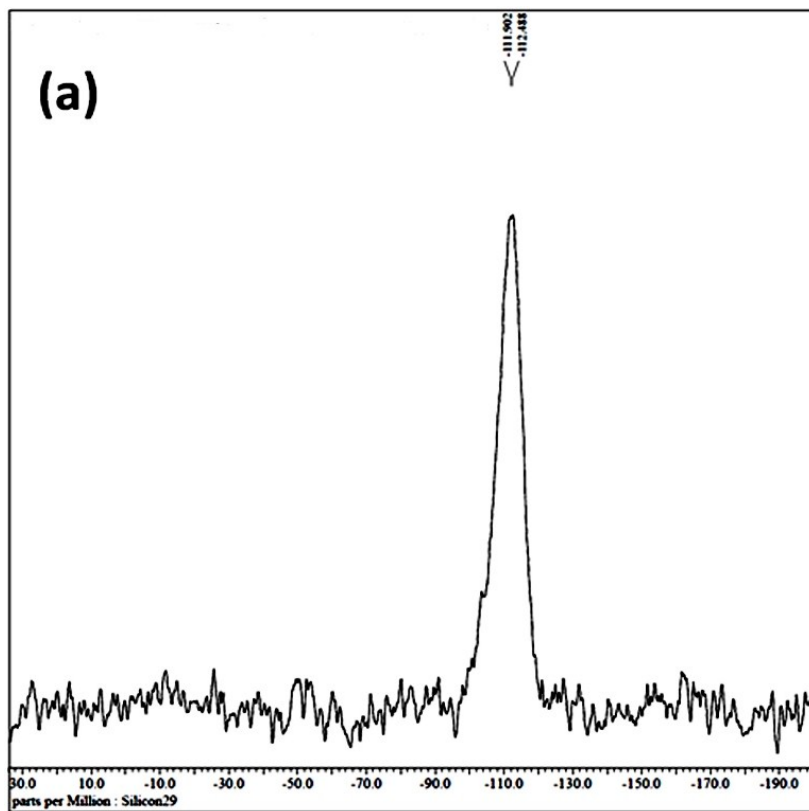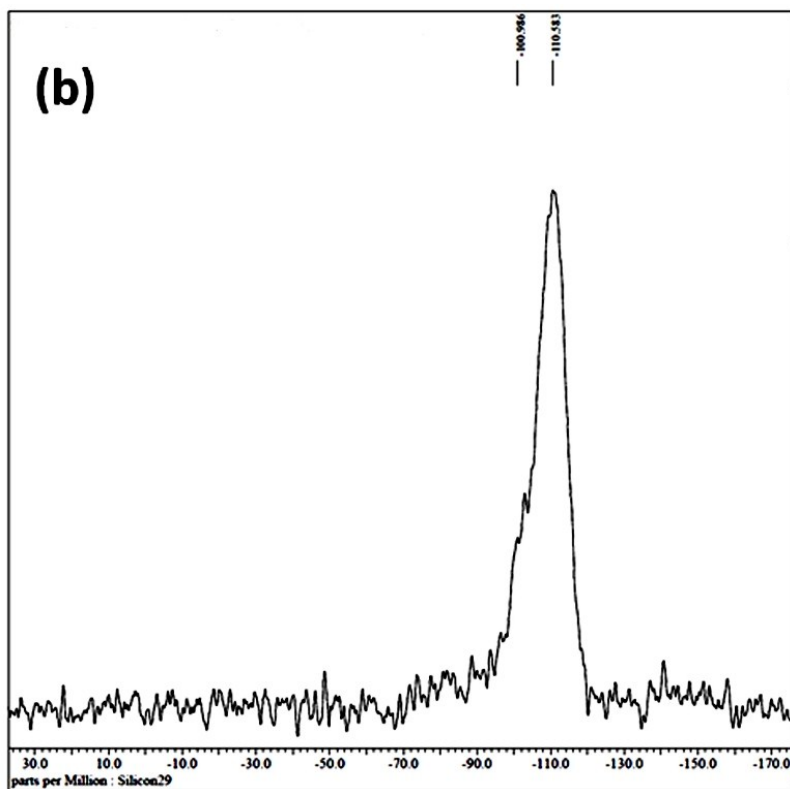

Figure S3.  $^{29}\text{Si}$  NMR spectra of (a) Gel Paste - 4 and (b) Gel Paste - 6

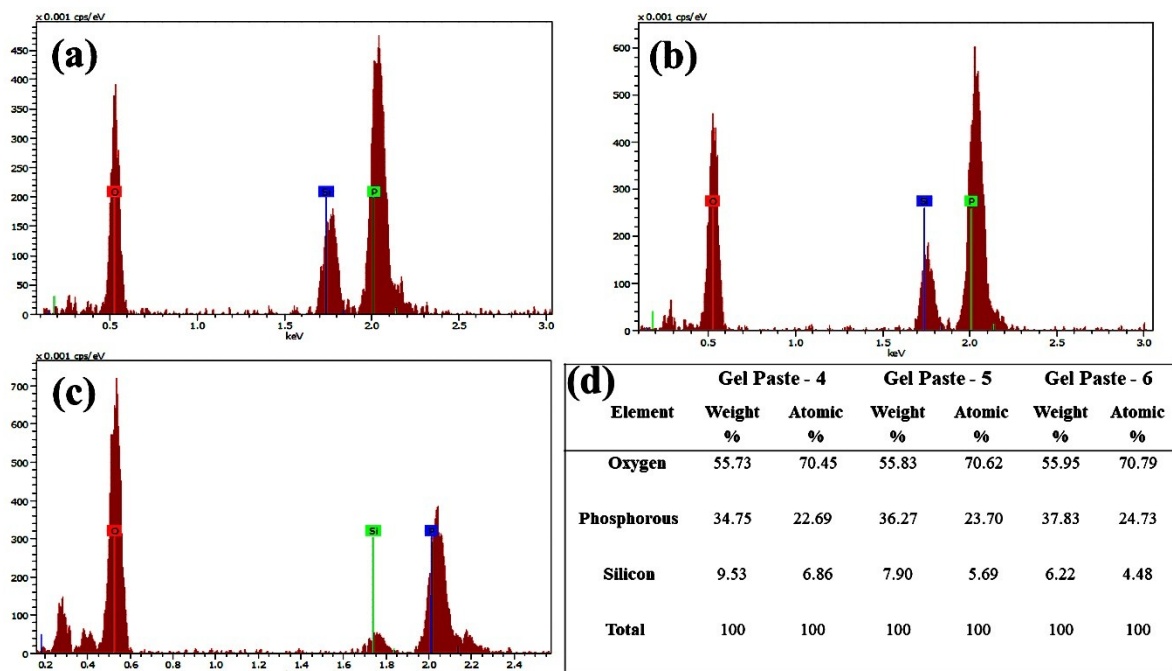

Figure S4. EDX analysis of three gel pastes

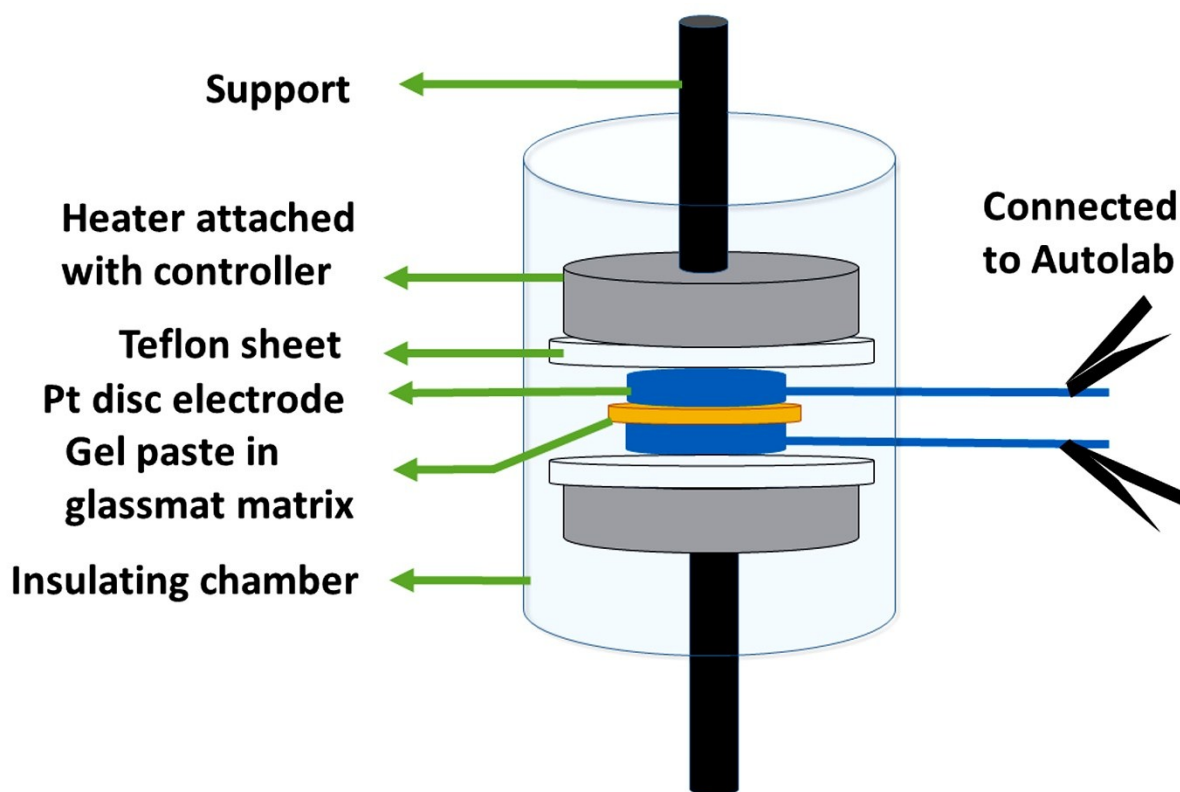

Figure S5. Proton conductivity measurement setup
